# Supplementary material
Source: Springer Nature journal article supplement (https://www.springermedizin.de/resource/supplementary/12970_2009_156_MOESM2_ESM.pdf/9594554)

Blood lactate (mmol/l)

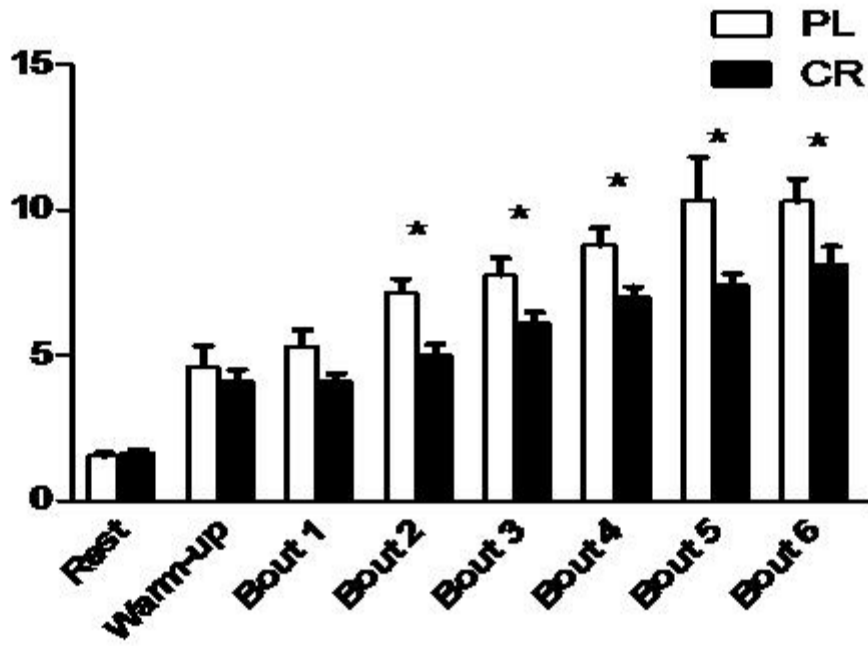

Supplement: MOESM2 [file 9594554]
